# Supplementary material for: A method to easily control the interfacial interactions between poly(3-hexylthiophene) and graphene oxide in an ultrasonicated solution
Source: Royal Society of Chemistry journal article supplement (doi:10.1039/d0ce00630k), 2020-01-01
Supplement: d0ce00630k1.pdf [file d0ce00630k1.pdf]

### Supporting Information

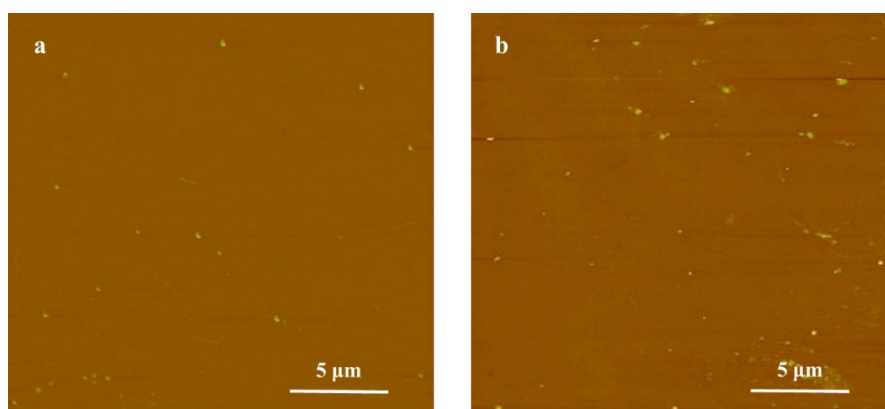

Figure S1. AFM images of the Si wafer removed from the (a) high  $M_w$  and (b) low  $M_w$  P3HT solutions ultrasonicated for 10 min and crystallized at 20 °C for 24 h.

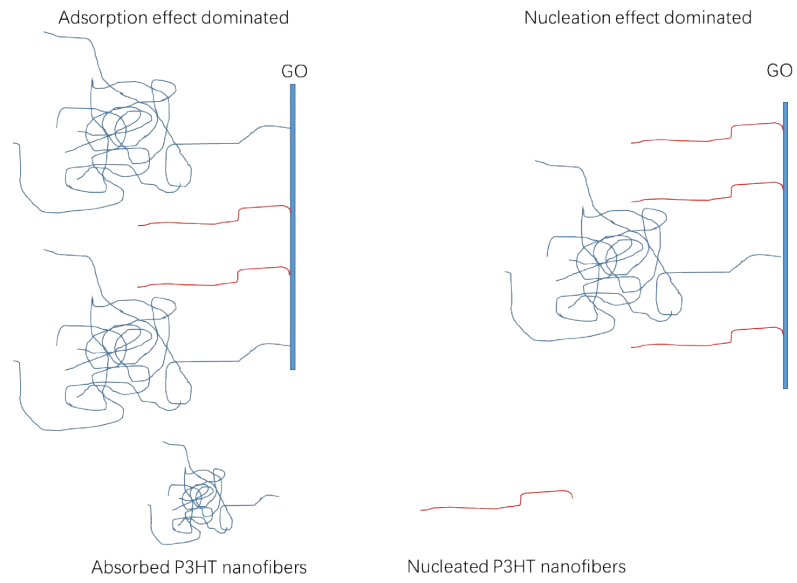

Figure S2. The schematic of the absorbed P3HT nanofibers and nucleated P3HT nanofibers on GO surface.
